# Supplementary material for: Antimicrobial Polymeric Composites with Embedded Nanotextured Magnesium Oxide
Source: MDPI journal article supplement (doi:10.3390/polym13132183), 2021-06-30
Supplement: s1 [file s1]

# Antimicrobial Polymeric Composites with Embedded Nanotextured Magnesium Oxide

## Supporting information

Nemanja Aničić,<sup>1</sup> Mario Kurtjak,<sup>1</sup> Samo Jeverica,<sup>2</sup> Danilo Suvorov,<sup>1</sup> Marija Vukomanović<sup>1,\*</sup>

<sup>1</sup> Advanced Materials Department, Jozef Stefan Institute, Ljubljana, Slovenia

<sup>2</sup> National Laboratory of Health, Environment and Food, Maribor, Slovenia

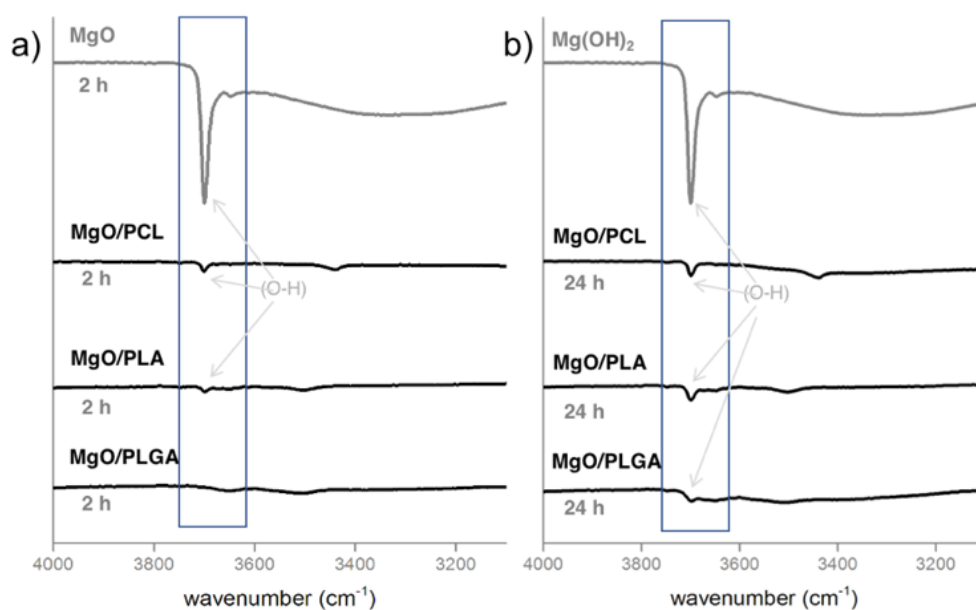

**Figure S1.** IR spectra of the MgO/polymer composites after a) 2-hour and b) 24-hour exposure to physiological solution.

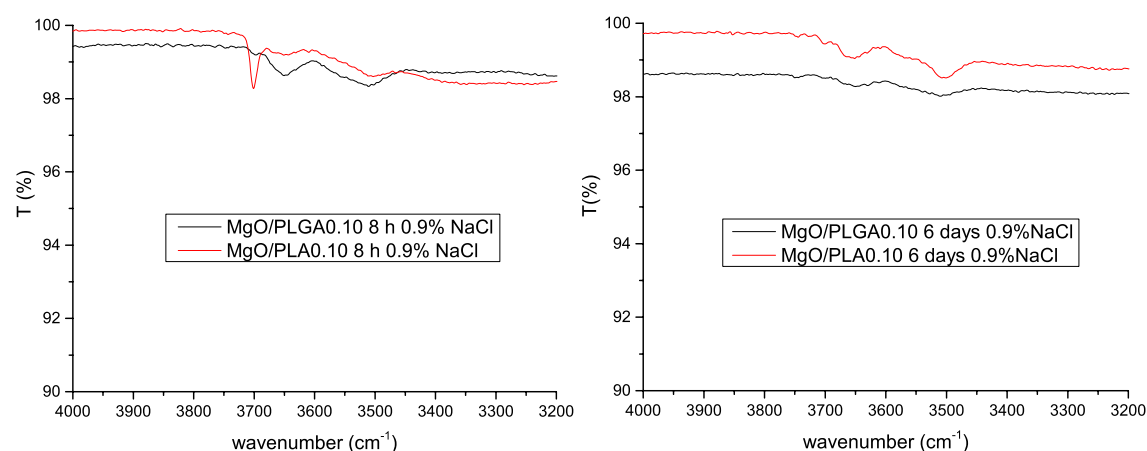

\* Corresponding author: [marija.vukomanovic@ijs.si](mailto:marija.vukomanovic@ijs.si), +386 1 477 3547

**Figure S2:** ATR IR spectra of MgO/PLGA0.10 and MgO/PLA0.10 composites after 8 h and 6 days in 0.9 % NaCl at 37 °C and linear shaking.

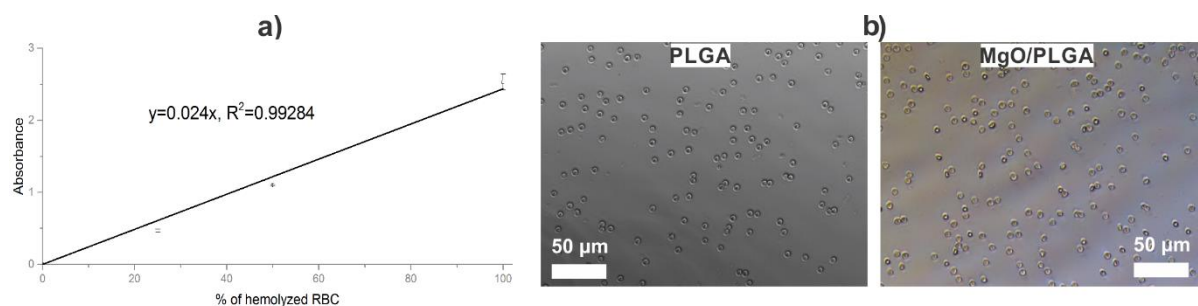

**Figure S3:** a) Calibration curve for haemolysis determination. b) RBCs on the PLGA and MgO/PLGA0.10 coatings as observed under optical microscope.
